# Supplementary material for: Predicting cellular electrophysiology with generative modeling
Source: Research Square preprint supplement (doi:10.21203/rs.3.rs-7744481/v1), 2026-01-21
Supplement: Supplementary file 1 [file f3dcf4e6406018fe884e0fdc.xlsx]

## Sheet: LLM markers
CellType	MarkerGene	weights
Acetylcholine Receptors (Muscarinic)	CHRM1	17
Acetylcholine Receptors (Muscarinic)	CHRM2	12
Acetylcholine Receptors (Muscarinic)	CHRM3	12
Acetylcholine Receptors (Muscarinic)	CHRM4	13
Acetylcholine Receptors (Muscarinic)	CHRM5	12
Acetylcholine Receptors (Nicotinic)	CHRNA10	2
Acetylcholine Receptors (Nicotinic)	CHRNA2	1
Acetylcholine Receptors (Nicotinic)	CHRNA3	5
Acetylcholine Receptors (Nicotinic)	CHRNA4	8
Acetylcholine Receptors (Nicotinic)	CHRNA5	1
Acetylcholine Receptors (Nicotinic)	CHRNA6	2
Acetylcholine Receptors (Nicotinic)	CHRNA7	13
Acetylcholine Receptors (Nicotinic)	CHRNA9	2
Acetylcholine Receptors (Nicotinic)	CHRNB2	7
Acetylcholine Receptors (Nicotinic)	CHRNB3	1
Acetylcholine Receptors (Nicotinic)	CHRNB4	4
Action Potential Machinery	CACNA1A	2
Action Potential Machinery	CACNA1C	2
Action Potential Machinery	KCNA1	1
Action Potential Machinery	KCNB1	1
Action Potential Machinery	KCNQ2	1
Action Potential Machinery	KCNQ3	1
Action Potential Machinery	SCN1A	2
Action Potential Machinery	SCN2A	2
Action Potential Machinery	SCN8A	1
Activated Microglia	AIF1	240
Activated Microglia	ARG1	14
Activated Microglia	C1QA	5
Activated Microglia	CCL2	6
Activated Microglia	CD163	8
Activated Microglia	CD206	10
Activated Microglia	CD40	2
Activated Microglia	CD68	238
Activated Microglia	CD86	34
Activated Microglia	CX3CR1	190
Activated Microglia	HLA-DRA	51
Activated Microglia	HLA-DRB1	1
Activated Microglia	IBA1	44
Activated Microglia	IL10	12
Activated Microglia	IL1B	53
Activated Microglia	IL6	25
Activated Microglia	ITGAM	137
Activated Microglia	NFKB1	14
Activated Microglia	NLRP3	18
Activated Microglia	NOS2	22
Activated Microglia	P2RY12	83
Activated Microglia	PTGS2	7
Activated Microglia	SPP1	3
Activated Microglia	TLR4	8
Activated Microglia	TMEM119	202
Activated Microglia	TNF	46
Activated Microglia	TREM2	35
Activated Microglia	TSPO	11
Activated Microglia (M1)	CD86	9
Activated Microglia (M1)	IL1B	11
Activated Microglia (M1)	IL6	6
Activated Microglia (M1)	NOS2	9
Activated Microglia (M1)	TNF	11
Activated Microglia (M2)	ARG1	9
Activated Microglia (M2)	CD163	6
Activated Microglia (M2)	IL10	7
Activated Microglia (M2)	MRC1	7
Ampa Receptors	GRIA1	17
Ampa Receptors	GRIA2	14
Ampa Receptors	GRIA3	13
Ampa Receptors	GRIA4	12
Antigen Presenting Cell	CD40	3
Antigen Presenting Cell	CD74	6
Antigen Presenting Cell	CD80	3
Antigen Presenting Cell	CD86	6
Antigen Presenting Cell	HLA-DRA	7
Antigen Presenting Cell	HLA-DRB1	4
Antigen Presenting Cell	ITGAX	2
Astrocyte	ALDH1L1	154
Astrocyte	AQP4	171
Astrocyte	BDNF	8
Astrocyte	C3	12
Astrocyte	CD44	4
Astrocyte	FABP7	4
Astrocyte	GFAP	303
Astrocyte	GLUL	6
Astrocyte	S100A10	6
Astrocyte	S100B	171
Astrocyte	SLC1A2	47
Astrocyte	SLC1A3	20
Astrocyte	SOX9	9
Astrocyte	STAT3	7
Astrocyte	TNF	8
Astrocyte	VIM	12
B Cell	BCL2	10
B Cell	CD19	37
B Cell	CD20	20
B Cell	CD22	16
B Cell	CD24	3
B Cell	CD38	2
B Cell	CD79A	34
B Cell	CD79B	30
B Cell	IGHM	1
B Cell	MS4A1	19
B Cell	PAX5	10
Basophil	CCR3	3
Basophil	CPA3	5
Basophil	FCER1A	5
Basophil	IL3RA	5
Breg Cell	CD19	3
Breg Cell	CD24	3
Breg Cell	CD38	3
Breg Cell	IL10	3
Cd4 T Cell	CCR7	27
Cd4 T Cell	CD3D	13
Cd4 T Cell	CD3E	10
Cd4 T Cell	CD3G	8
Cd4 T Cell	CD4	53
Cd4 T Cell	CXCR4	1
Cd4 T Cell	FOXP3	15
Cd4 T Cell	ICOS	1
Cd4 T Cell	IL2RA	8
Cd4 T Cell	IL7R	24
Cd4 T Cell	LCK	2
Cd4 T Cell	LEF1	11
Cd4 T Cell	SELL	16
Cd4 T Cell	TCF7	9
Cd4 Tfh Cell	BCL6	1
Cd4 Tfh Cell	CXCR5	1
Cd4 Tfh Cell	ICOS	1
Cd4 Tfh Cell	IL21	1
Cd4 Tfh Cell	PDCD1	1
Cd4 Th Cell	CCR7	4
Cd4 Th Cell	CD4	6
Cd4 Th Cell	FOXP3	1
Cd4 Th Cell	IL7R	4
Cd4 Th Cell	SELL	2
Cd4 Th1 Cell	CXCR3	12
Cd4 Th1 Cell	IFNG	12
Cd4 Th1 Cell	IL12RB2	7
Cd4 Th1 Cell	STAT4	8
Cd4 Th1 Cell	TBX21	10
Cd4 Th17 Cell	CCR6	10
Cd4 Th17 Cell	IL17A	10
Cd4 Th17 Cell	IL17F	2
Cd4 Th17 Cell	IL21	4
Cd4 Th17 Cell	IL23R	9
Cd4 Th17 Cell	RORC	9
Cd4 Th17 Cell	STAT3	7
Cd4 Th2 Cell	CCR4	6
Cd4 Th2 Cell	CCR8	3
Cd4 Th2 Cell	GATA3	5
Cd4 Th2 Cell	IL13	5
Cd4 Th2 Cell	IL4	5
Cd4 Th2 Cell	IL5	5
Cd4 Treg Cell	CD4	5
Cd4 Treg Cell	CTLA4	12
Cd4 Treg Cell	FOXP3	16
Cd4 Treg Cell	IKZF2	8
Cd4 Treg Cell	IL2RA	11
Cd4 Treg Cell	TIGIT	4
Cd4 Treg Cell	TNFRSF18	1
Cd8 T Cell	CD3D	1
Cd8 T Cell	CD8A	72
Cd8 T Cell	CD8B	65
Cd8 T Cell	GZMA	9
Cd8 T Cell	GZMB	34
Cd8 T Cell	IFNG	29
Cd8 T Cell	PRF1	31
Central Memory Cd8 T Cell	CCR7	11
Central Memory Cd8 T Cell	CD27	1
Central Memory Cd8 T Cell	CD28	1
Central Memory Cd8 T Cell	CD8A	8
Central Memory Cd8 T Cell	CD8B	7
Central Memory Cd8 T Cell	IL7R	11
Central Memory Cd8 T Cell	LEF1	1
Central Memory Cd8 T Cell	SELL	7
Central Memory Cd8 T Cell	TCF7	2
Cholinergic Neuron	ACHE	44
Cholinergic Neuron	CHAT	70
Cholinergic Neuron	CHRNA3	4
Cholinergic Neuron	CHRNA4	1
Cholinergic Neuron	CHRNA7	6
Cholinergic Neuron	CHRNB2	1
Cholinergic Neuron	SLC18A3	42
Cholinergic Neuron	SLC5A7	8
Common Lymphoid Progenitor	CD10	1
Common Lymphoid Progenitor	CD34	1
Common Lymphoid Progenitor	DNTT	1
Common Lymphoid Progenitor	FLT3	1
Common Lymphoid Progenitor	IL7R	1
Common Myeloid Progenitor	CD117	1
Common Myeloid Progenitor	CD123	4
Common Myeloid Progenitor	CD33	4
Common Myeloid Progenitor	CD34	7
Common Myeloid Progenitor	CD38	6
Common Myeloid Progenitor	CSF1R	1
Conventional Dendritic Cell	CD1C	1
Conventional Dendritic Cell	CLEC9A	1
Conventional Dendritic Cell	FCER1A	1
Conventional Dendritic Cell	HLA-DRA	1
Conventional Dendritic Cell	IRF8	2
Cycling Progenitor Cell	CCNB1	18
Cycling Progenitor Cell	CCND1	1
Cycling Progenitor Cell	CDK1	8
Cycling Progenitor Cell	MCM2	36
Cycling Progenitor Cell	MCM4	6
Cycling Progenitor Cell	MKI67	43
Cycling Progenitor Cell	NES	6
Cycling Progenitor Cell	PAX6	1
Cycling Progenitor Cell	PCNA	38
Cycling Progenitor Cell	SOX2	17
Cycling Progenitor Cell	TOP2A	36
Cytotoxic Cd8 T Cell	CD8A	20
Cytotoxic Cd8 T Cell	CD8B	18
Cytotoxic Cd8 T Cell	GNLY	6
Cytotoxic Cd8 T Cell	GZMA	1
Cytotoxic Cd8 T Cell	GZMB	16
Cytotoxic Cd8 T Cell	IFNG	11
Cytotoxic Cd8 T Cell	NKG7	1
Cytotoxic Cd8 T Cell	PRF1	16
Dendritic Cell	CCR7	7
Dendritic Cell	CD11C	13
Dendritic Cell	CD11c	6
Dendritic Cell	CD1C	80
Dendritic Cell	CD209	44
Dendritic Cell	CD80	18
Dendritic Cell	CD83	16
Dendritic Cell	CD86	21
Dendritic Cell	CLEC9A	58
Dendritic Cell	HLA-DRA	84
Dendritic Cell	ITGAX	71
Dendritic Cell	LAMP3	31
Dopaminergic Neuron	DAT	10
Dopaminergic Neuron	DDC	93
Dopaminergic Neuron	DRD2	13
Dopaminergic Neuron	EN1	4
Dopaminergic Neuron	FOXA2	9
Dopaminergic Neuron	LMX1A	13
Dopaminergic Neuron	NR4A2	48
Dopaminergic Neuron	NURR1	9
Dopaminergic Neuron	PITX3	16
Dopaminergic Neuron	SLC18A2	65
Dopaminergic Neuron	SLC6A3	115
Dopaminergic Neuron	SNCA	21
Dopaminergic Neuron	TH	170
Effector Cd8 T Cell	CD8A	8
Effector Cd8 T Cell	CD8B	8
Effector Cd8 T Cell	GNLY	2
Effector Cd8 T Cell	GZMB	8
Effector Cd8 T Cell	IFNG	8
Effector Cd8 T Cell	PRF1	8
Effector Cd8 T Cell	TBX21	1
Embryonic Astrocyte	ALDH1L1	11
Embryonic Astrocyte	AQP4	12
Embryonic Astrocyte	FABP7	4
Embryonic Astrocyte	GFAP	31
Embryonic Astrocyte	NES	10
Embryonic Astrocyte	S100B	18
Embryonic Astrocyte	SOX2	12
Embryonic Astrocyte	SOX9	10
Embryonic Astrocyte	VIM	9
Embryonic Microglia	AIF1	4
Embryonic Microglia	CSF1R	2
Embryonic Microglia	CX3CR1	15
Embryonic Microglia	P2RY12	15
Embryonic Microglia	SALL1	2
Embryonic Microglia	SPI1	2
Embryonic Microglia	TMEM119	16
Embryonic Microglia	TREM2	8
Embryonic Stem Cell	KLF4	1
Embryonic Stem Cell	LIN28A	2
Embryonic Stem Cell	NANOG	57
Embryonic Stem Cell	POU5F1	45
Embryonic Stem Cell	SOX2	62
Endothelial Cell	ACE2	8
Endothelial Cell	CD31	21
Endothelial Cell	CD34	18
Endothelial Cell	CDH5	174
Endothelial Cell	CLDN5	179
Endothelial Cell	EDN1	6
Endothelial Cell	ENG	122
Endothelial Cell	ESAM	9
Endothelial Cell	FLT1	59
Endothelial Cell	ICAM1	10
Endothelial Cell	ICAM2	4
Endothelial Cell	IL6	8
Endothelial Cell	KDR	37
Endothelial Cell	MCAM	3
Endothelial Cell	OCLN	40
Endothelial Cell	PECAM1	187
Endothelial Cell	PLVAP	2
Endothelial Cell	SELE	8
Endothelial Cell	SLC2A1	10
Endothelial Cell	TEK	2
Endothelial Cell	TIE1	26
Endothelial Cell	TJP1	28
Endothelial Cell	VCAM1	10
Endothelial Cell	VEGFA	33
Endothelial Cell	VEGFR2	6
Endothelial Cell	VWF	194
Endothelial Progenitor	CD133	8
Endothelial Progenitor	CD31	1
Endothelial Progenitor	CD34	10
Endothelial Progenitor	KDR	6
Endothelial Progenitor	VWF	3
Endothelial Progenitor Cell	CD34	7
Endothelial Progenitor Cell	KDR	6
Eosinophil	CCR3	13
Eosinophil	CLC	14
Eosinophil	IL5RA	18
Eosinophil	PRG2	15
Eosinophil	RNASE2	11
Eosinophil	RNASE3	14
Eosinophil	SIGLEC8	19
Exhausted T Cell	CD244	1
Exhausted T Cell	CTLA4	25
Exhausted T Cell	EOMES	1
Exhausted T Cell	HAVCR2	26
Exhausted T Cell	LAG3	25
Exhausted T Cell	PDCD1	26
Exhausted T Cell	TIGIT	25
Exhausted T Cell	TOX	15
Fibroblast	ACTA2	32
Fibroblast	COL1A1	71
Fibroblast	COL1A2	26
Fibroblast	DCN	23
Fibroblast	FAP	43
Fibroblast	FBLN1	3
Fibroblast	FN1	11
Fibroblast	FSP1	24
Fibroblast	LUM	20
Fibroblast	PDGFRA	62
Fibroblast	PDGFRB	14
Fibroblast	S100A4	13
Fibroblast	THY1	9
Fibroblast	VIM	46
Gaba Receptors	GABBR1	17
Gaba Receptors	GABBR2	17
Gaba Receptors	GABRA1	57
Gaba Receptors	GABRA2	39
Gaba Receptors	GABRA3	10
Gaba Receptors	GABRA4	8
Gaba Receptors	GABRA5	7
Gaba Receptors	GABRA6	1
Gaba Receptors	GABRB1	31
Gaba Receptors	GABRB2	52
Gaba Receptors	GABRB3	13
Gaba Receptors	GABRD	20
Gaba Receptors	GABRE	9
Gaba Receptors	GABRG1	10
Gaba Receptors	GABRG2	56
Gaba Receptors	GABRG3	8
Gaba Receptors	GABRP	8
Gaba Receptors	GABRQ	8
Gaba Receptors	GAD1	6
Gaba Receptors	GAD2	6
Gaba Transporters	SLC6A1	5
Gaba Transporters	SLC6A11	5
Gaba Transporters	SLC6A12	2
Gaba Transporters	SLC6A13	2
Gabaergic Neuron	CALB1	6
Gabaergic Neuron	CALB2	16
Gabaergic Neuron	DLX1	3
Gabaergic Neuron	DLX2	3
Gabaergic Neuron	ERBB4	1
Gabaergic Neuron	GAD1	117
Gabaergic Neuron	GAD2	122
Gabaergic Neuron	LHX6	4
Gabaergic Neuron	NPY	3
Gabaergic Neuron	PVALB	36
Gabaergic Neuron	RELN	1
Gabaergic Neuron	SLC32A1	53
Gabaergic Neuron	SLC6A1	8
Gabaergic Neuron	SST	30
Gabaergic Neuron	VIP	13
Germ Cell	AFP	10
Germ Cell	DAZL	8
Germ Cell	DDX4	9
Germ Cell	KIT	7
Germ Cell	NANOG	29
Germ Cell	OCT4	8
Germ Cell	POU5F1	22
Germ Cell	PRDM1	1
Germ Cell	SALL4	9
Germ Cell	SOX17	4
Germ Cell	SOX2	23
Germ Cell	TFAP2C	1
Glioma Stem Cell	ALDH1A1	2
Glioma Stem Cell	BMI1	2
Glioma Stem Cell	CD133	54
Glioma Stem Cell	CD44	18
Glioma Stem Cell	EGFR	6
Glioma Stem Cell	GFAP	8
Glioma Stem Cell	GLI1	7
Glioma Stem Cell	MUSASHI1	1
Glioma Stem Cell	NANOG	6
Glioma Stem Cell	NES	29
Glioma Stem Cell	NESTIN	30
Glioma Stem Cell	Nestin	8
Glioma Stem Cell	OCT4	7
Glioma Stem Cell	OLIG2	42
Glioma Stem Cell	PROM1	17
Glioma Stem Cell	SOX2	71
Glioma Stem Cell (Gsc)	CD133	11
Glioma Stem Cell (Gsc)	SOX2	6
Glutamate Transporters	SLC17A6	19
Glutamate Transporters	SLC17A7	20
Glutamate Transporters	SLC17A8	10
Glutamate Transporters	SLC1A1	16
Glutamate Transporters	SLC1A2	61
Glutamate Transporters	SLC1A3	63
Glutamate Transporters	SLC1A6	7
Glutamate Transporters	SLC1A7	5
Glutamatergic Neuron	GLS	39
Glutamatergic Neuron	GRIA1	37
Glutamatergic Neuron	GRIA2	9
Glutamatergic Neuron	GRIA3	3
Glutamatergic Neuron	GRIN1	52
Glutamatergic Neuron	SLC17A6	96
Glutamatergic Neuron	SLC17A7	98
Glutamatergic Neuron	SLC17A8	21
Glutamatergic Neuron	SLC1A2	5
Glutamatergic Neuron	SLC1A3	1
Glutamatergic Neuron	VGLUT1	35
Glutamatergic Neuron	VGLUT2	34
Hcn Channels	HCN1	2
Hcn Channels	HCN2	1
Hcn Channels	HCN3	1
Hcn Channels	HCN4	2
Hematopoietic Stem Cell	CD133	10
Hematopoietic Stem Cell	CD34	23
Hematopoietic Stem Cell	CD38	11
Hematopoietic Stem Cell	CD45	9
Hematopoietic Stem Cell	CD90	6
Hematopoietic Stem Cell	GATA2	11
Hematopoietic Stem Cell	KIT	18
Hematopoietic Stem Cell	PROM1	11
Hematopoietic Stem Cell	RUNX1	10
Immature Myeloid Cell	CD14	1
Immature Myeloid Cell	CD33	1
Immature Myeloid Cell	S100A8	1
Immature Myeloid Cell	S100A9	1
Intermediate Neural Progenitor	ASCL1	7
Intermediate Neural Progenitor	DLL1	1
Intermediate Neural Progenitor	EOMES	6
Intermediate Neural Progenitor	NEUROD1	1
Intermediate Neural Progenitor	PAX6	5
Intermediate Neural Progenitor	TBR2	8
Ionotropic Receptors	CHRNA7	3
Ionotropic Receptors	CHRNB2	1
Ionotropic Receptors	GABRA1	6
Ionotropic Receptors	GABRB2	6
Ionotropic Receptors	GABRG2	1
Ionotropic Receptors	GRIA1	6
Ionotropic Receptors	GRIA2	3
Ionotropic Receptors	GRIA3	2
Ionotropic Receptors	GRIA4	1
Ionotropic Receptors	GRIK1	1
Ionotropic Receptors	GRIK2	1
Ionotropic Receptors	GRIK3	1
Ionotropic Receptors	GRIK4	1
Ionotropic Receptors	GRIK5	1
Ionotropic Receptors	GRIN1	7
Ionotropic Receptors	GRIN2A	6
Ionotropic Receptors	GRIN2B	5
Ionotropic Receptors	GRIN2C	1
Ionotropic Receptors	GRIN2D	1
Ionotropic Receptors	P2RX2	2
Ionotropic Receptors	P2RX4	1
Kainate Receptors	GRIK1	4
Kainate Receptors	GRIK2	4
Kainate Receptors	GRIK3	4
Kainate Receptors	GRIK4	4
Kainate Receptors	GRIK5	4
Kv Channels	KCNA1	1
Kv Channels	KCNA2	1
Kv Channels	KCNB1	1
Kv Channels	KCNC1	1
Kv Channels	KCND1	1
Kv Channels	KCND2	1
Kv Channels	KCND3	1
Kv Channels	KCNH1	1
Kv Channels	KCNQ2	1
Kv Channels	KCNQ3	1
Kv Channels	KCNQ5	1
L2/3 It Neuron	CUX1	2
L2/3 It Neuron	CUX2	3
L2/3 It Neuron	RORB	1
L2/3 It Neuron	SATB2	3
L6B Neuron	Ctgf	1
L6B Neuron	TLE4	1
Lamp5 Neuron	LAMP5	1
Lamp5 Neuron	NDNF	1
Lamp5 Neuron	RELN	1
Lamp5 Neuron	VIP	1
Lymphatic Endothelial Cell	CCL21	30
Lymphatic Endothelial Cell	CLDN5	6
Lymphatic Endothelial Cell	FLT4	277
Lymphatic Endothelial Cell	FOXC2	42
Lymphatic Endothelial Cell	LYVE1	320
Lymphatic Endothelial Cell	PDPN	316
Lymphatic Endothelial Cell	PROX1	317
Lymphatic Endothelial Cell	VEGF	6
Lymphatic Endothelial Cell	VEGFA	10
Lymphatic Endothelial Cell	VEGFC	269
Lymphatic Endothelial Cell	VEGFR3	30
M1 Macrophage	CCL2	6
M1 Macrophage	CD80	25
M1 Macrophage	CD86	76
M1 Macrophage	CXCL10	24
M1 Macrophage	HLA-DR	6
M1 Macrophage	HLA-DRA	40
M1 Macrophage	IL1B	78
M1 Macrophage	IL6	38
M1 Macrophage	NOS2	82
M1 Macrophage	TNF	78
M2 Macrophage	ARG1	122
M2 Macrophage	CCL18	2
M2 Macrophage	CD163	123
M2 Macrophage	CD206	117
M2 Macrophage	CD209	40
M2 Macrophage	CHI3L1	1
M2 Macrophage	CLEC10A	1
M2 Macrophage	IL10	110
M2 Macrophage	MRC1	18
M2 Macrophage	MS4A4A	6
M2 Macrophage	MSR1	19
M2 Macrophage	TGF1	17
M2 Macrophage	TGFB1	9
M2 Macrophage	TGFBI	1
Macrophage	AIF1	38
Macrophage	ARG1	19
Macrophage	CCL2	8
Macrophage	CD11b	6
Macrophage	CD14	62
Macrophage	CD163	128
Macrophage	CD206	20
Macrophage	CD68	134
Macrophage	CD86	19
Macrophage	CSF1R	96
Macrophage	CX3CR1	5
Macrophage	F480	6
Macrophage	HLA-DRA	2
Macrophage	IBA1	22
Macrophage	IL10	13
Macrophage	IL1B	19
Macrophage	IL6	17
Macrophage	ITGAM	80
Macrophage	MRC1	15
Macrophage	NOS2	13
Macrophage	P2RY12	2
Macrophage	TMEM119	8
Macrophage	TNF	23
Macrophage	TREM2	10
Macrophage (Microglia)	CD68	7
Macrophage (Microglia)	CX3CR1	7
Macrophage (Microglia)	P2RY12	6
Macrophage (Microglia)	TMEM119	9
Mast Cell	CMA1	8
Mast Cell	CPA3	24
Mast Cell	FCER1A	11
Mast Cell	HDC	6
Mast Cell	KIT	23
Mast Cell	MS4A2	23
Mast Cell	TPSAB1	24
Mast Cell	TPSB2	22
Mature B Cell	CD19	3
Mature B Cell	CD20	2
Mature B Cell	CD22	1
Mature B Cell	CD79A	3
Mature B Cell	CD79B	2
Mature B Cell	PAX5	1
Mature Neuron	BDNF	8
Mature Neuron	CAMK2A	7
Mature Neuron	DCX	1
Mature Neuron	DLG4	7
Mature Neuron	ENO2	17
Mature Neuron	GAD1	8
Mature Neuron	GAD2	6
Mature Neuron	GRIN1	2
Mature Neuron	MAP2	129
Mature Neuron	NEUN	112
Mature Neuron	RBFOX3	54
Mature Neuron	SLC17A6	6
Mature Neuron	SLC17A7	30
Mature Neuron	SNAP25	45
Mature Neuron	SYN1	40
Mature Neuron	SYP	71
Mature Neuron	SYT1	9
Mature Neuron	TUBB3	20
Memory B Cell	CD19	4
Memory B Cell	CD24	3
Memory B Cell	CD27	4
Memory B Cell	CD38	4
Memory B Cell	CD80	1
Memory B Cell	CD86	1
Memory T Cell	CCR7	5
Memory T Cell	CD3E	2
Memory T Cell	CD4	2
Memory T Cell	CD44	2
Memory T Cell	CD45RO	5
Memory T Cell	CD8A	2
Memory T Cell	CXCR3	1
Memory T Cell	IL7R	5
Mesenchymal Stem Cell	BDNF	9
Mesenchymal Stem Cell	CD105	71
Mesenchymal Stem Cell	CD146	14
Mesenchymal Stem Cell	CD166	1
Mesenchymal Stem Cell	CD29	16
Mesenchymal Stem Cell	CD44	30
Mesenchymal Stem Cell	CD73	65
Mesenchymal Stem Cell	CD90	75
Mesenchymal Stem Cell	ENG	17
Mesenchymal Stem Cell	FN1	10
Mesenchymal Stem Cell	GFAP	6
Mesenchymal Stem Cell	NES	5
Mesenchymal Stem Cell	NT5E	16
Mesenchymal Stem Cell	THY1	17
Mesenchymal Stem Cell	VIM	20
Mesenchymal Stem Cell (Msc)	CD105	8
Mesenchymal Stem Cell (Msc)	CD73	8
Mesenchymal Stem Cell (Msc)	CD90	8
Metabotropic Receptors	CHRM1	1
Metabotropic Receptors	CHRM2	1
Metabotropic Receptors	CHRM3	1
Metabotropic Receptors	CHRM4	1
Metabotropic Receptors	CHRM5	1
Metabotropic Receptors	CNR1	1
Metabotropic Receptors	CNR2	1
Metabotropic Receptors	GABBR1	2
Metabotropic Receptors	GABBR2	2
Metabotropic Receptors	GRM1	8
Metabotropic Receptors	GRM2	6
Metabotropic Receptors	GRM3	7
Metabotropic Receptors	GRM4	7
Metabotropic Receptors	GRM5	11
Metabotropic Receptors	GRM6	6
Metabotropic Receptors	GRM7	6
Metabotropic Receptors	GRM8	6
Metabotropic Receptors	OPRD1	1
Metabotropic Receptors	OPRK1	1
Metabotropic Receptors	OPRM1	1
Microglia	AIF1	138
Microglia	APOE	6
Microglia	ARG1	22
Microglia	C1QA	7
Microglia	CCL2	7
Microglia	CD16	8
Microglia	CD206	22
Microglia	CD68	64
Microglia	CD86	15
Microglia	CSF1R	20
Microglia	CX3CR1	166
Microglia	GPR34	1
Microglia	HIF1A	7
Microglia	IBA1	67
Microglia	IL10	18
Microglia	IL1B	43
Microglia	IL6	23
Microglia	ITGAM	19
Microglia	NF-B	6
Microglia	NFKB1	9
Microglia	NLRP3	15
Microglia	NOS2	15
Microglia	P2RY12	169
Microglia	TLR4	8
Microglia	TMEM119	168
Microglia	TNF	37
Microglia	TREM2	69
Microglia	TSPO	10
Microglia	iNOS	11
Monocyte	CCL2	11
Monocyte	CCR2	65
Monocyte	CD11b	7
Monocyte	CD14	97
Monocyte	CD16	15
Monocyte	CD163	27
Monocyte	CD68	86
Monocyte	CSF1R	31
Monocyte	CX3CR1	8
Monocyte	FCGR3A	34
Monocyte	IL1B	8
Monocyte	IL6	7
Monocyte	ITGAM	71
Monocyte	LYZ	7
Monocyte	S100A8	10
Monocyte	S100A9	10
Monocyte	TNF	8
Monocytic Mdsc	ARG1	2
Monocytic Mdsc	CD11b	2
Monocytic Mdsc	CD14	3
Monocytic Mdsc	CD33	3
Monocytic Mdsc	HLA-DR	2
Monocytic Mdsc	IL4R	1
Monocytic Mdsc	S100A9	3
Natural Killer Cell	FCGR3A	11
Natural Killer Cell	GNLY	44
Natural Killer Cell	GZMB	45
Natural Killer Cell	KLRC1	3
Natural Killer Cell	KLRC2	1
Natural Killer Cell	KLRD1	45
Natural Killer Cell	KLRF1	7
Natural Killer Cell	KLRK1	7
Natural Killer Cell	NCAM1	45
Natural Killer Cell	NCR1	43
Natural Killer Cell	NKG7	45
Natural Killer Cell	PRF1	41
Natural Killer T Cell	CD3D	19
Natural Killer T Cell	CD3E	20
Natural Killer T Cell	CD3G	17
Natural Killer T Cell	CD4	2
Natural Killer T Cell	CD69	1
Natural Killer T Cell	CD8A	2
Natural Killer T Cell	CD8B	1
Natural Killer T Cell	GZMB	6
Natural Killer T Cell	KLRB1	24
Natural Killer T Cell	NCAM1	23
Natural Killer T Cell	NCR1	9
Natural Killer T Cell	NKG7	9
Natural Killer T Cell	TRAV10	17
Natural Killer T Cell	TRBV25-1	15
Natural Killer T Cell	ZBTB16	21
Nav Channels	SCN2A	1
Neural Crest Cell	FOXD3	15
Neural Crest Cell	KIT	1
Neural Crest Cell	NES	5
Neural Crest Cell	NGFR	5
Neural Crest Cell	PAX3	15
Neural Crest Cell	S100B	6
Neural Crest Cell	SNAI2	10
Neural Crest Cell	SOX10	17
Neural Crest Cell	SOX9	2
Neural Crest Cell	TFAP2A	4
Neural Crest Cell	TWIST1	3
Neural Progenitor	ASCL1	5
Neural Progenitor	DCX	17
Neural Progenitor	GFAP	9
Neural Progenitor	HES1	8
Neural Progenitor	MSI1	27
Neural Progenitor	NES	38
Neural Progenitor	NESTIN	47
Neural Progenitor	OLIG2	9
Neural Progenitor	PAX6	73
Neural Progenitor	SOX2	83
Neural Progenitor	TBR2	2
Neural Progenitor	VIM	17
Neural Progenitor Cell	NES	9
Neural Progenitor Cell	NESTIN	8
Neural Progenitor Cell	PAX6	11
Neural Progenitor Cell	SOX2	16
Neural Progenitor Cells	MSI1	7
Neural Progenitor Cells	NES	7
Neural Progenitor Cells	NESTIN	8
Neural Progenitor Cells	PAX6	12
Neural Progenitor Cells	SOX2	12
Neural Stem Cell	ASCL1	2
Neural Stem Cell	BDNF	9
Neural Stem Cell	CD133	9
Neural Stem Cell	DCX	20
Neural Stem Cell	FABP7	3
Neural Stem Cell	GFAP	51
Neural Stem Cell	MKI67	15
Neural Stem Cell	MSI1	77
Neural Stem Cell	NES	171
Neural Stem Cell	NESTIN	106
Neural Stem Cell	NEUN	9
Neural Stem Cell	Nestin	6
Neural Stem Cell	OLIG2	6
Neural Stem Cell	PAX6	151
Neural Stem Cell	POU5F1	8
Neural Stem Cell	PROM1	105
Neural Stem Cell	SOX2	263
Neural Stem Cell	TUBB3	11
Neural Stem Cell	VIM	27
Neutrophil	CD66b	15
Neutrophil	CEACAM8	84
Neutrophil	CSF3R	34
Neutrophil	CXCR1	12
Neutrophil	CXCR2	51
Neutrophil	ELANE	75
Neutrophil	FCGR3B	107
Neutrophil	ITGAM	7
Neutrophil	LCN2	26
Neutrophil	LY6G	6
Neutrophil	LYZ	11
Neutrophil	MPO	102
Neutrophil	NLR	8
Neutrophil	S100A8	116
Neutrophil	S100A9	117
Nmda Receptors	GRIN1	37
Nmda Receptors	GRIN2A	34
Nmda Receptors	GRIN2B	37
Nmda Receptors	GRIN2C	21
Nmda Receptors	GRIN2D	22
Nmda Receptors	GRIN3A	19
Nmda Receptors	GRIN3B	19
Oligodendrocyte	BCAS1	6
Oligodendrocyte	CLDN11	1
Oligodendrocyte	CNP	127
Oligodendrocyte	GPR17	4
Oligodendrocyte	MAG	18
Oligodendrocyte	MBP	282
Oligodendrocyte	MOBP	1
Oligodendrocyte	MOG	247
Oligodendrocyte	NG2	9
Oligodendrocyte	O4	8
Oligodendrocyte	OLIG1	157
Oligodendrocyte	OLIG2	275
Oligodendrocyte	PDGFRA	19
Oligodendrocyte	PLP1	216
Oligodendrocyte	SOX10	181
Oligodendrocyte Precursor	CSPG4	10
Oligodendrocyte Precursor	OLIG1	7
Oligodendrocyte Precursor	OLIG2	11
Oligodendrocyte Precursor	PDGFRA	12
Oligodendrocyte Precursor	SOX10	5
Outer Radial Glia	FAM107A	7
Outer Radial Glia	HES1	1
Outer Radial Glia	HOPX	8
Outer Radial Glia	LIFR	1
Outer Radial Glia	PTPRZ1	7
Outer Radial Glia	TNC	7
Pericyte	ABCC9	12
Pericyte	ACTA2	47
Pericyte	ANPEP	17
Pericyte	CD13	10
Pericyte	CD146	54
Pericyte	CD248	6
Pericyte	CSPG4	71
Pericyte	DES	11
Pericyte	KCNJ8	8
Pericyte	MCAM	7
Pericyte	PDGFRB	84
Pericyte	RGS5	72
Plasma B Cell	CD38	7
Plasma B Cell	IRF4	1
Plasma B Cell	MZB1	6
Plasma B Cell	PRDM1	6
Plasma B Cell	SDC1	4
Plasma B Cell	TNFRSF17	1
Plasma B Cell	XBP1	6
Plasmacytoid Dendritic Cell	CLEC4C	136
Plasmacytoid Dendritic Cell	GZMB	93
Plasmacytoid Dendritic Cell	IL3RA	133
Plasmacytoid Dendritic Cell	IRF7	13
Plasmacytoid Dendritic Cell	IRF8	4
Plasmacytoid Dendritic Cell	LILRA4	136
Plasmacytoid Dendritic Cell	SPIB	40
Plasmacytoid Dendritic Cell	TCF4	110
Pluripotent Stem Cell	DPPA4	1
Pluripotent Stem Cell	KLF4	22
Pluripotent Stem Cell	LIN28A	13
Pluripotent Stem Cell	MYC	6
Pluripotent Stem Cell	NANOG	253
Pluripotent Stem Cell	OCT4	31
Pluripotent Stem Cell	POU5F1	192
Pluripotent Stem Cell	SOX2	263
Pluripotent Stem Cell	SSEA4	10
Pluripotent Stem Cell	TDGF1	1
Pluripotent Stem Cell	TRA-1-60	11
Pluripotent Stem Cell (Ipsc)	NANOG	10
Pluripotent Stem Cell (Ipsc)	POU5F1	7
Pluripotent Stem Cell (Ipsc)	SOX2	11
Pvalb Neuron	GAD1	2
Pvalb Neuron	GAD2	2
Pvalb Neuron	LHX6	1
Pvalb Neuron	PVALB	9
Radial Glia	BLBP	9
Radial Glia	FABP7	4
Radial Glia	GFAP	22
Radial Glia	GLAST	2
Radial Glia	HES1	3
Radial Glia	NES	17
Radial Glia	PAX6	7
Radial Glia	SOX2	21
Radial Glia	VIM	21
Serotonergic Neuron	HTR1A	6
Serotonergic Neuron	HTR2A	9
Serotonergic Neuron	MAOA	1
Serotonergic Neuron	SLC18A2	5
Serotonergic Neuron	SLC6A4	21
Serotonergic Neuron	TPH2	21
Serotonin Receptors	HTR1A	13
Serotonin Receptors	HTR1B	11
Serotonin Receptors	HTR1D	1
Serotonin Receptors	HTR1E	1
Serotonin Receptors	HTR1F	1
Serotonin Receptors	HTR2A	12
Serotonin Receptors	HTR2B	5
Serotonin Receptors	HTR2C	14
Serotonin Receptors	HTR3A	14
Serotonin Receptors	HTR3B	3
Serotonin Receptors	HTR3C	1
Serotonin Receptors	HTR3D	1
Serotonin Receptors	HTR3E	1
Serotonin Receptors	HTR4	11
Serotonin Receptors	HTR5A	11
Serotonin Receptors	HTR6	12
Serotonin Receptors	HTR7	11
Snare Complex	SNAP25	6
Snare Complex	STX1A	5
Snare Complex	STXBP1	3
Snare Complex	SYT1	2
Snare Complex	VAMP2	5
Sst Neuron	CALB1	1
Sst Neuron	GAD1	2
Sst Neuron	GAD2	3
Sst Neuron	NPY	1
Sst Neuron	RELN	2
Sst Neuron	SST	24
Synaptic Neuron	APP	6
Synaptic Neuron	ARC	6
Synaptic Neuron	BDNF	18
Synaptic Neuron	CAMK2A	16
Synaptic Neuron	CREB1	7
Synaptic Neuron	DLG4	42
Synaptic Neuron	FOS	10
Synaptic Neuron	GAD1	12
Synaptic Neuron	GAD2	11
Synaptic Neuron	GRIA1	17
Synaptic Neuron	GRIN1	31
Synaptic Neuron	GRIN2A	6
Synaptic Neuron	HOMER1	6
Synaptic Neuron	MAP2	78
Synaptic Neuron	MAPT	16
Synaptic Neuron	NEUN	69
Synaptic Neuron	NLGN1	4
Synaptic Neuron	PSD95	10
Synaptic Neuron	RBFOX3	28
Synaptic Neuron	SHANK3	6
Synaptic Neuron	SLC17A6	9
Synaptic Neuron	SLC17A7	27
Synaptic Neuron	SLC32A1	5
Synaptic Neuron	SNAP25	115
Synaptic Neuron	SNCA	8
Synaptic Neuron	STX1A	1
Synaptic Neuron	SYN1	144
Synaptic Neuron	SYN2	9
Synaptic Neuron	SYP	137
Synaptic Neuron	TH	6
Synaptic Neuron	VAMP2	8
Synaptic Neuron	VGLUT1	8
Synaptic Plasticity Genes	ARC	8
Synaptic Plasticity Genes	BDNF	11
Synaptic Plasticity Genes	CAMK2A	5
Synaptic Plasticity Genes	CREB1	4
Synaptic Plasticity Genes	EGR1	3
Synaptic Plasticity Genes	FOS	5
Synaptic Plasticity Genes	GRIN1	4
Synaptic Plasticity Genes	NTRK2	1
Synaptic Plasticity Genes	SYN1	7
Synaptic Plasticity Genes	SYP	1
Synaptic Scaffolding Proteins	DLG4	4
Synaptic Scaffolding Proteins	HOMER1	4
Synaptic Scaffolding Proteins	HOMER2	4
Synaptic Scaffolding Proteins	HOMER3	4
Synaptic Scaffolding Proteins	SHANK1	4
Synaptic Scaffolding Proteins	SHANK2	4
Synaptic Scaffolding Proteins	SHANK3	6
Synaptic Vesicle Machinery	SLC17A6	1
Synaptic Vesicle Machinery	SLC17A7	1
Synaptic Vesicle Machinery	SNAP25	1
Synaptic Vesicle Machinery	STX1A	1
Synaptic Vesicle Machinery	SYT1	1
Synaptic Vesicle Machinery	VAMP2	1
T Cell	CD2	25
T Cell	CD3	16
T Cell	CD3D	84
T Cell	CD3E	97
T Cell	CD3G	88
T Cell	CD4	130
T Cell	CD69	6
T Cell	CD7	22
T Cell	CD8	21
T Cell	CD8A	112
T Cell	CD8B	96
T Cell	CTLA4	8
T Cell	FOXP3	13
T Cell	HAVCR2	6
T Cell	IFNG	9
T Cell	IL2RA	9
T Cell	IL7R	8
T Cell	LAG3	6
T Cell	LCK	2
T Cell	PDCD1	15
T Cell	TRAC	19
T Cell	TRBC1	12
T Cell	TRBC2	11
T Cell	ZAP70	1
Tissue Associated Macrophage	AIF1	5
Tissue Associated Macrophage	CD163	7
Tissue Associated Macrophage	CD68	7
Tissue Associated Macrophage	CSF1R	5
Tissue Associated Macrophage	CX3CR1	1
Tissue Associated Macrophage	ITGAM	5
Tissue Associated Macrophage	P2RY12	1
Tissue Associated Macrophage	TMEM119	1
Tissue Associated Macrophage	TREM2	1
Tissue-Associated Macrophage	AIF1	20
Tissue-Associated Macrophage	CD14	7
Tissue-Associated Macrophage	CD163	30
Tissue-Associated Macrophage	CD68	31
Tissue-Associated Macrophage	CSF1R	22
Tissue-Associated Macrophage	CX3CR1	7
Tissue-Associated Macrophage	MRC1	6
Tissue-Associated Macrophage	P2RY12	7
Tissue-Associated Macrophage	TMEM119	11
Tissue-Associated Macrophage (Tam)	CD163	8
Tissue-Associated Macrophage (Tam)	CD68	8
Tissue-Associated Macrophage (Tam)	CSF1R	7
Vascular Endothelial Cell	ABCB1	8
Vascular Endothelial Cell	ACE2	8
Vascular Endothelial Cell	ANGPT2	7
Vascular Endothelial Cell	CD31	20
Vascular Endothelial Cell	CD34	20
Vascular Endothelial Cell	CDH5	207
Vascular Endothelial Cell	CLDN5	192
Vascular Endothelial Cell	ENG	151
Vascular Endothelial Cell	ESAM	26
Vascular Endothelial Cell	FLT1	104
Vascular Endothelial Cell	ICAM1	12
Vascular Endothelial Cell	ICAM2	1
Vascular Endothelial Cell	IL6	6
Vascular Endothelial Cell	KDR	86
Vascular Endothelial Cell	MCAM	4
Vascular Endothelial Cell	NOS3	7
Vascular Endothelial Cell	OCLN	34
Vascular Endothelial Cell	PECAM1	220
Vascular Endothelial Cell	PLVAP	2
Vascular Endothelial Cell	SELE	8
Vascular Endothelial Cell	SLC2A1	8
Vascular Endothelial Cell	TEK	9
Vascular Endothelial Cell	TIE1	35
Vascular Endothelial Cell	TIE2	8
Vascular Endothelial Cell	TJP1	27
Vascular Endothelial Cell	VCAM1	11
Vascular Endothelial Cell	VEGF	7
Vascular Endothelial Cell	VEGFA	34
Vascular Endothelial Cell	VEGFR2	6
Vascular Endothelial Cell	VWF	228
Vascular Leptomeningeal Cell	COL1A1	3
Vascular Leptomeningeal Cell	COL1A2	2
Vascular Leptomeningeal Cell	DCN	2
Vascular Leptomeningeal Cell	LUM	2
Vascular Leptomeningeal Cell	MRC1	1
Vascular Leptomeningeal Cell	PDGFRA	2
Ventricular Radial Glia	FABP7	1
Ventricular Radial Glia	HES1	1
Ventricular Radial Glia	NES	1
Ventricular Radial Glia	PAX6	1
Ventricular Radial Glia	SOX2	3
Ventricular Radial Glia	VIM	2
Vip Neuron	CALB2	12
Vip Neuron	CCK	3
Vip Neuron	CRH	4
Vip Neuron	NPY	6
Vip Neuron	RELN	7
Vip Neuron	SST	3
Vip Neuron	VIP	24
γδ T Cell	CD3D	3
γδ T Cell	CD3E	3
γδ T Cell	CD3G	3
γδ T Cell	TRDC	3
γδ T Cell	TRDV1	3
γδ T Cell	TRDV2	3
γδ T Cell	TRGC1	3
γδ T Cell	TRGC2	3
γδ T Cell	TRGV9	3
